# Supplementary material for: The use of a direct bronchial challenge test in primary care to diagnose asthma
Source: PubMed Central journal article supplement (PMC7567813; doi:10.1038/s41533-020-00202-y), 2020-10-16
Supplement: 41533_2020_202_MOESM1_ESM.pdf [file 41533_2020_202_MOESM1_ESM.pdf]

**Supplementary Table 1. Parameter estimates**

| Dependent Variable:        |                |            |        |       |                         |        |                     |
|----------------------------|----------------|------------|--------|-------|-------------------------|--------|---------------------|
| Parameter                  | B              | Std. Error | t      | Sig.  | 95% Confidence Interval |        | Partial Eta Squared |
|                            |                |            |        |       | Lower                   | Upper  |                     |
| Intercept                  | 0.592          | 0.024      | 24.390 | 0.000 | 0.544                   | 0.639  | 0.481               |
| [Gender=0]                 | -0.025         | 0.041      | -0.609 | 0.543 | -0.104                  | 0.055  | 0.001               |
| [Gender=1]                 | 0 <sup>a</sup> |            |        |       |                         |        |                     |
| Intercept                  | 0.679          | 0.06       | 11.375 | 0     | 0.562                   | 0.796  | 0.168               |
| Age.1                      | -0.002         | 0.001      | -1.702 | 0.089 | -0.005                  | 0      | 0.004               |
| Intercept                  | 0.626          | 0.030      | 21.188 | 0.000 | 0.568                   | 0.684  | 0.416               |
| [fam.categ=.00]            | -0.079         | 0.039      | -2.013 | 0.044 | -0.157                  | -0.002 | 0.006               |
| [fam.categ=1.00]           | 0 <sup>a</sup> |            |        |       |                         |        |                     |
| Intercept                  | 0.416          | 0.100      | 4.162  | 0.000 | 0.220                   | 0.612  | 0.026               |
| BMI.1                      | 0.006          | 0.004      | 1.701  | 0.089 | -0.001                  | 0.013  | 0.004               |
| Intercept                  | 0.622          | 0.029      | 21.368 | 0.000 | 0.565                   | 0.680  | 0.415               |
| [Smoked.1=.00]             | -0.071         | 0.039      | -1.815 | 0.070 | -0.148                  | 0.006  | 0.005               |
| [Smoked.1=1.00]            | 0 <sup>a</sup> |            |        |       |                         |        |                     |
| Intercept                  | 0.589          | 0.036      | 16.514 | 0.000 | 0.519                   | 0.659  | 0.298               |
| [ICS.1=.00]                | -0.008         | 0.043      | -0.187 | 0.851 | -0.091                  | 0.076  | 0.000               |
| [ICS.1=1.00]               | 0 <sup>a</sup> |            |        |       |                         |        |                     |
| Intercept                  | 0.511          | 0.053      | 9.730  | 0.000 | 0.408                   | 0.615  | 0.128               |
| [All_NONE=.00]             | 0.083          | 0.057      | 1.466  | 0.143 | -0.028                  | 0.194  | 0.003               |
| [All_NONE=1.00]            | 0 <sup>a</sup> |            |        |       |                         |        |                     |
| Intercept                  | 0.640          | 0.039      | 16.474 | 0.000 | 0.563                   | 0.716  | 0.297               |
| [All_ever.SEIZOENEN=.00]   | -0.076         | 0.045      | -1.689 | 0.092 | -0.164                  | 0.012  | 0.004               |
| [All_ever.SEIZOENEN=1.00]  | 0 <sup>a</sup> |            |        |       |                         |        |                     |
| Intercept                  | 0.609          | 0.051      | 11.825 | 0.000 | 0.508                   | 0.710  | 0.179               |
| [All_ever.BOMEN=.00]       | -0.030         | 0.056      | -0.540 | 0.589 | -0.139                  | 0.079  | 0.000               |
| [All_ever.BOMEN=1.00]      | 0 <sup>a</sup> |            |        |       |                         |        |                     |
| Intercept                  | 0.622          | 0.081      | 7.658  | 0.000 | 0.462                   | 0.781  | 0.084               |
| [All_ever.VOEDSEL=.00]     | -0.041         | 0.084      | -0.491 | 0.624 | -0.205                  | 0.123  | 0.000               |
| [All_ever.VOEDSEL=1.00]    | 0 <sup>a</sup> |            |        |       |                         |        |                     |
| Intercept                  | 0.441          | 0.084      | 5.221  | 0.000 | 0.275                   | 0.607  | 0.041               |
| [All_ever.BAKLUCHT=.00]    | 0.150          | 0.087      | 1.724  | 0.085 | -0.021                  | 0.320  | 0.005               |
| [All_ever.BAKLUCHT=1.00]   | 0 <sup>a</sup> |            |        |       |                         |        |                     |
| Intercept                  | 0.601          | 0.039      | 15.308 | 0.000 | 0.524                   | 0.678  | 0.267               |
| [All_ever.KOUDELUCHT=.00]  | -0.024         | 0.045      | -0.537 | 0.592 | -0.113                  | 0.065  | 0.000               |
| [All_ever.KOUDELUCHT=1.00] | 0 <sup>a</sup> |            |        |       |                         |        |                     |
| Intercept                  | 0.587          | 0.047      | 12.413 | 0.000 | 0.494                   | 0.680  | 0.193               |
| [All_ever.GRASSEN=.00]     | -0.005         | 0.052      | -0.098 | 0.922 | -0.107                  | 0.097  | 0.000               |
| [All_ever.GRASSEN=1.00]    | 0 <sup>a</sup> |            |        |       |                         |        |                     |

|                                 |                |       |        |       |        |           |       |
|---------------------------------|----------------|-------|--------|-------|--------|-----------|-------|
| Intercept                       | 0.702          | 0.048 | 14.577 | 0.000 | 0.607  | 0.796     | 0.248 |
| [All_ever.HUISDIEREN=.00]       | -0.142         | 0.053 | -2.698 | 0.007 | -0.245 | -0.039    | 0.011 |
| [All_ever.HUISDIEREN=1.00]      | 0 <sup>a</sup> |       |        |       |        |           |       |
| Intercept                       | 0.610          | 0.032 | 18.802 | 0.000 | 0.547  | 0.674     | 0.355 |
| [All_ever.STOF=.00]             | -0.043         | 0.041 | -1.055 | 0.292 | -0.122 | 0.037     | 0.002 |
| [All_ever.STOF=1.00]            | 0 <sup>a</sup> |       |        |       |        |           |       |
| Intercept                       | 0.549          | 0.045 | 12.290 | 0.000 | 0.461  | 0.637     | 0.190 |
| [All_ever.ANDERS=.00]           | 0.042          | 0.050 | 0.839  | 0.402 | -0.056 | 0.139     | 0.001 |
| [All_ever.ANDERS=1.00]          | 0 <sup>a</sup> |       |        |       |        |           |       |
| Intercept                       | 0.556          | 0.028 | 19.944 | 0.000 | 0.501  | 0.611     | 0.382 |
| [All_ever.INSPANNING=.00]       | 0.053          | 0.039 | 1.352  | 0.177 | -0.024 | 0.129     | 0.003 |
| [All_ever.INSPANNING=1.00]      | 0 <sup>a</sup> |       |        |       |        |           |       |
| Intercept                       | 0.564          | 0.067 | 8.465  | 0.000 | 0.433  | 0.694     | 0.100 |
| [Dich_Nasal.antiallergy.1=.00]  | 0.021          | 0.070 | 0.303  | 0.762 | -0.116 | 0.158     | 0.000 |
| [Dich_Nasal.antiallergy.1=1.00] | 0 <sup>a</sup> |       |        |       |        |           |       |
| Intercept                       | 0.568          | 0.055 | 10.350 | 0.000 | 0.460  | 0.676     | 0.143 |
| [Dich_Oralallergy.1=.00]        | 0.017          | 0.059 | 0.293  | 0.769 | -0.098 | 0.132     | 0.000 |
| [Dich_Oralallergy.1=1.00]       | 0 <sup>a</sup> |       |        |       |        |           |       |
| Intercept                       | 0.584          | 0.026 | 22.683 | 0.000 | 0.533  | 0.634     | 0.445 |
| ACQ1.1                          | 0.000          | 0.014 | -0.036 | 0.972 | -0.028 | 0.027     | 0.000 |
| Intercept                       | 0.613          | 0.028 | 21.620 | 0.000 | 0.557  | 0.669     | 0.421 |
| ACQ2.1                          | -0.020         | 0.014 | -1.458 | 0.145 | -0.048 | 0.007     | 0.003 |
| Intercept                       | 0.606          | 0.033 | 18.107 | 0.000 | 0.541  | 0.672     | 0.338 |
| ACQ3.1                          | -0.013         | 0.015 | -0.859 | 0.391 | -0.044 | 0.017     | 0.001 |
| Intercept                       | 0.602          | 0.036 | 16.674 | 0.000 | 0.531  | 0.673     | 0.302 |
| ACQ4.1                          | -0.009         | 0.015 | -0.631 | 0.528 | -0.039 | 0.020     | 0.001 |
| Intercept                       | 0.548          | 0.027 | 20.373 | 0.000 | 0.495  | 0.601     | 0.392 |
| ACQ5.1 wheezing                 | 0.026          | 0.014 | 1.875  | 0.061 | -0.001 | 0.054     | 0.005 |
| Intercept                       | 0.557          | 0.022 | 25.776 | 0.000 | 0.515  | 0.600     | 0.508 |
| ACQ6.1 use of bronchodilators   | 0.065          | 0.024 | 2.669  | 0.008 | 0.017  | 0.113     | 0.011 |
| Intercept                       | 0.579          | 0.035 | 16.339 | 0.000 | 0.509  | 0.649     | 0.293 |
| ACQ_total.1                     | 0.003          | 0.022 | 0.130  | 0.896 | -0.040 | 0.045     | 0.000 |
| Intercept                       | 0.650          | 0.041 | 16.010 | 0.000 | 0.570  | 0.729     | 0.289 |
| Ageofonset.1                    | -0.002         | 0.001 | -1.942 | 0.053 | -0.004 | 0.000E+00 | 0.006 |
| Intercept                       | 0.532          | 0.026 | 20.369 | 0.000 | 0.480  | 0.583     | 0.397 |
| Reversibility in %              | 0.014          | 0.005 | 2.861  | 0.004 | 0.004  | 0.024     | 0.013 |
| Intercept                       | 1.279          | 0.203 | 6.288  | 0.000 | 0.880  | 1.679     | 0.058 |
| fev1_fvc Post                   | -0.009         | 0.003 | -3.439 | 0.001 | -0.014 | -0.004    | 0.018 |
| Intercept                       | 1.312          | 0.197 | 6.679  | 0.000 | 0.927  | 1.698     | 0.066 |
| fev1_fvc Pre                    | -0.009         | 0.002 | -3.739 | 0.000 | -0.014 | -0.004    | 0.022 |
| Intercept                       | 1.138          | 0.146 | 7.782  | 0.000 | 0.851  | 1.426     | 0.086 |

|                         |        |       |        |       |        |        |       |
|-------------------------|--------|-------|--------|-------|--------|--------|-------|
| fev1Post % of predicted | -0.006 | 0.001 | -3.824 | 0.000 | -0.008 | -0.003 | 0.022 |
| <hr/>                   |        |       |        |       |        |        |       |
| Intercept               | 1.244  | 0.143 | 8.673  | 0.000 | 0.963  | 1.526  | 0.107 |
| fev1Pre % of predicted  | -0.007 | 0.001 | -4.657 | 0.000 | -0.010 | -0.004 | 0.033 |
| <hr/>                   |        |       |        |       |        |        |       |
| Intercept               | 0.665  | 0.148 | 4.485  | 0.000 | 0.374  | 0.956  | 0.030 |
| fvcPost % of predicted  | -0.001 | 0.001 | -0.552 | 0.581 | -0.004 | 0.002  | 0.000 |
| <hr/>                   |        |       |        |       |        |        |       |
| Intercept               | 0.697  | 0.148 | 4.727  | 0.000 | 0.408  | 0.987  | 0.034 |
| fvcPre % of predicted   | -0.001 | 0.001 | -0.786 | 0.432 | -0.004 | 0.002  | 0.001 |

Abbreviations: *ACQ* asthma control questionnaire, *BMI* body mass index, *FEV1* forced expiratory volume in 1 s, *FVC* forced vital capacity, *ICS* inhalation corticosteroid

#### LEGEND

*All.none* - no allergy

*All.ever* - Allergy ever for (*Seizoenen* seasons; *Bomen* trees; *Voedsel* nutrition; *Baklucht* baking air; *Koude lucht* cold air; *Grassen* grass; *Huisdieren* pets; *Stof* dust; *Anders* other; *Inspanning* exercise;

*Dich\_Oralallergy* – takes oral anti-allergy medication

*Dich\_Nasal.antiallergy* – takes nasal anti-allergy medication

*fam.categ* - positive family history for asthma

*ICS* – inhaled corticosteroid use
